# Supplementary material
Source: PubMed Central journal article supplement (PMC5683097)
Supplement: NIHMS905754-supplement.pdf [file NIHMS905754-supplement.pdf]

**Appendix 1. International Classification of Disease, 9th edition, Clinical Modification (ICD-9-CM) Diagnosis Codes Used to Define Leiomyoma, Bulk Symptoms, and Comorbidities**

| <b>Diagnoses</b>                      | <b>ICD-9-CM</b>                                                | <b>Description</b>                                                                   |
|---------------------------------------|----------------------------------------------------------------|--------------------------------------------------------------------------------------|
| <b>Uterine fibroids</b>               | 218.xx                                                         | Uterine leiomyoma                                                                    |
|                                       | 218.0                                                          | Submucous leiomyoma of uterus                                                        |
|                                       | 218.1                                                          | Intramural leiomyoma of uterus                                                       |
|                                       | 218.2                                                          | Subserous leiomyoma of uterus                                                        |
|                                       | 218.9                                                          | Leiomyoma of uterus, unspecified                                                     |
|                                       | 219.xx                                                         | Other benign neoplasm of uterus                                                      |
|                                       | 219.0                                                          | Benign neoplasm of cervix uteri                                                      |
|                                       | 219.1                                                          | Benign neoplasm of corpus uteri                                                      |
|                                       | 219.8                                                          | Benign neoplasm of other specified parts of uterus                                   |
|                                       | 219.9                                                          | Benign neoplasm of uterus, part unspecified                                          |
|                                       | 654.1x                                                         | Tumors of body of uterus                                                             |
|                                       | 654.10                                                         | Tumors of body of uterus, unspecified as to episode of care or not applicable        |
|                                       | 654.11                                                         | Tumors of body of uterus, delivered, with or without mention of antepartum condition |
|                                       | 654.12                                                         | Tumors of body of uterus, delivered, with mention of postpartum complication         |
| 654.13                                | Tumors of body of uterus, antepartum condition or complication |                                                                                      |
| 654.14                                | Tumors of body of uterus, postpartum condition or complication |                                                                                      |
| <b>Bulk symptoms</b>                  |                                                                |                                                                                      |
| <i><b>Pelvic pain or pressure</b></i> | 625.0                                                          | Dyspareunia                                                                          |
|                                       | 625.3                                                          | Dysmenorrhea                                                                         |
|                                       | 789.03                                                         | Abdominal pain, right lower quadrant                                                 |
|                                       | 789.63                                                         | Abdominal tenderness, right lower quadrant                                           |
|                                       | 789.64                                                         | Abdominal tenderness, left lower quadrant                                            |
|                                       | 789.9                                                          | Other symptoms involving abdomen and pelvis                                          |
|                                       | 789.00                                                         | Abdominal pain, unspecified site                                                     |
|                                       | 789.04                                                         | Abdominal pain, left lower quadrant                                                  |
|                                       | 789.07                                                         | Abdominal pain, generalized                                                          |
| 789.09                                | Abdominal pain, other specified site                           |                                                                                      |
| <i><b>Urinary problems</b></i>        | 591.xx                                                         | Hydronephrosis                                                                       |
|                                       | 593.5x                                                         | Hydroureter                                                                          |
|                                       | 788.1                                                          | Dysuria                                                                              |
|                                       | 788.2                                                          | Retention of urine                                                                   |
|                                       | 788.20                                                         | Retention of urine, unspecified                                                      |

Borah BJ, Yao X, Laughlin-Tommaso SK, Heien HC, Steward EA. Comparative effectiveness of uterine leiomyoma procedures using a large insurance claims database. *Obstet Gynecol* 2017; 130.

The authors provided this information as a supplement to their article.

|                       |        |                                                    |
|-----------------------|--------|----------------------------------------------------|
|                       | 788.21 | Incomplete bladder emptying                        |
|                       | 788.29 | Other specified retention of urine                 |
|                       | 788.3  | Urinary incontinence                               |
|                       | 788.30 | Urinary incontinence, unspecified                  |
|                       | 788.31 | Urge incontinence                                  |
|                       | 788.33 | Mixed incontinence (male) (female)                 |
|                       | 788.34 | Incontinence without sensory awareness             |
|                       | 788.35 | Post-void dribbling                                |
|                       | 788.36 | Nocturnal enuresis                                 |
|                       | 788.37 | Continuous leakage                                 |
|                       | 788.38 | Overflow incontinence                              |
|                       | 788.39 | Other urinary incontinence                         |
|                       | 788.4  | Frequency of urination and polyuria                |
|                       | 788.41 | Urinary frequency                                  |
|                       | 788.42 | Polyuria                                           |
|                       | 788.43 | Nocturia                                           |
|                       | 788.5  | Oliguria and anuria                                |
|                       | 788.6  | Other abnormality of urination                     |
|                       | 788.61 | Splitting of urinary stream                        |
|                       | 788.62 | Slowing of urinary stream                          |
|                       | 788.63 | Urgency of urination                               |
|                       | 788.64 | Urinary hesitancy                                  |
|                       | 788.65 | Straining on urination                             |
|                       | 788.69 | Other abnormality of urination                     |
|                       | 788.7  | Urethral discharge                                 |
|                       | 788.8  | Extravasation of urine                             |
|                       | 788.9  | Other symptoms involving urinary system            |
|                       | 788.91 | Functional urinary incontinence                    |
|                       | 788.99 | Other symptoms involving urinary system            |
| <b>Nocturia</b>       | 788.43 | Nocturia                                           |
| <b>Constipation</b>   | 564.00 | Constipation, unspecified                          |
|                       | 564.09 | Other constipation                                 |
|                       | 787.3  | Flatulence, eructation, and gas pain               |
|                       | 564.0  | Constipation                                       |
|                       | 564.01 | Slow transit constipation                          |
|                       | 564.02 | Outlet dysfunction constipation                    |
| <b>Dyspareunia</b>    | 625.0  | Dyspareunia                                        |
| <b>Uterine Cancer</b> | 179    | Malignant neoplasm of uterus, part unspecified     |
|                       | 182    | Malignant neoplasm of body of uterus               |
|                       | 182.0  | Malignant neoplasm of corpus uteri, except isthmus |

Borah BJ, Yao X, Laughlin-Tommaso SK, Heien HC, Steward EA. Comparative effectiveness of uterine leiomyoma procedures using a large insurance claims database. *Obstet Gynecol* 2017; 130.

The authors provided this information as a supplement to their article.

©2017 American College of Obstetricians and Gynecologists.

|                                 |        |                                                                                       |
|---------------------------------|--------|---------------------------------------------------------------------------------------|
|                                 | 182.1  | Malignant neoplasm of isthmus                                                         |
|                                 | 182.8  | Malignant neoplasm of other specified sites of body of uterus                         |
| <b>Other pelvic malignancy</b>  | 183    | Malignant neoplasm of ovary and other uterine adnexa                                  |
|                                 | 183.0  | Malignant neoplasm of ovary                                                           |
|                                 | 183.2  | Malignant neoplasm of fallopian tube                                                  |
|                                 | 183.3  | Malignant neoplasm of broad ligament of uterus                                        |
|                                 | 183.4  | Malignant neoplasm of parametrium                                                     |
|                                 | 183.5  | Malignant neoplasm of round ligament of uterus                                        |
|                                 | 183.8  | Malignant neoplasm of other specified sites of uterine adnexa                         |
|                                 | 183.9  | Malignant neoplasm of uterine adnexa, unspecified site                                |
| <b>Heavy menstrual bleeding</b> | 626.2  | Excessive or frequent menstruation                                                    |
|                                 | 627.0  | Premenopausal menorrhagia                                                             |
| <b>Anemia</b>                   | 280.xx | Iron deficiency anemias                                                               |
|                                 | 280.0  | Iron deficiency anemia secondary to blood loss (chronic)                              |
|                                 | 280.1  | Iron deficiency anemia secondary to inadequate dietary iron intake                    |
|                                 | 280.8  | Other specified iron deficiency anemias                                               |
|                                 | 280.9  | Iron deficiency anemia, unspecified                                                   |
|                                 | 285.1  | Acute posthemorrhagic anemia                                                          |
|                                 | 285.2  | Anemia of chronic disease                                                             |
|                                 | 285.29 | Anemia of other chronic disease                                                       |
|                                 | 285.8  | Other specified anemias                                                               |
|                                 | 285.9  | Anemia, unspecified                                                                   |
| <b>Inflammatory diseases</b>    | 614.xx | Inflammatory disease of ovary, fallopian tube, pelvic cellular tissue, and peritoneum |
|                                 | 614.0  | Acute salpingitis and oophoritis                                                      |
|                                 | 614.1  | Chronic salpingitis and oophoritis                                                    |
|                                 | 614.2  | Salpingitis and oophoritis not specified as acute, subacute, or chronic               |
|                                 | 614.3  | Acute parametritis and pelvic cellulitis                                              |
|                                 | 614.4  | Chronic or unspecified parametritis and pelvic cellulitis                             |
|                                 | 614.5  | Acute or unspecified pelvic peritonitis, female                                       |

Borah BJ, Yao X, Laughlin-Tommaso SK, Heien HC, Steward EA. Comparative effectiveness of uterine leiomyoma procedures using a large insurance claims database. *Obstet Gynecol* 2017; 130.

The authors provided this information as a supplement to their article.

©2017 American College of Obstetricians and Gynecologists.

|                                 |        |                                                                                   |
|---------------------------------|--------|-----------------------------------------------------------------------------------|
|                                 | 614.6  | Pelvic peritoneal adhesions, female (postoperative) (postinfection)               |
|                                 | 614.7  | Other chronic pelvic peritonitis, female                                          |
|                                 | 614.8  | Other specified inflammatory disease of female pelvic organs and tissues          |
|                                 | 614.9  | Unspecified inflammatory disease of female pelvic organs and tissues              |
|                                 | 615    | Inflammatory diseases of uterus, except cervix                                    |
|                                 | 615.0  | Acute inflammatory diseases of uterus, except cervix                              |
|                                 | 615.1  | Chronic inflammatory diseases of uterus, except cervix                            |
|                                 | 615.9  | Unspecified inflammatory disease of uterus                                        |
| <b>Noninflammatory diseases</b> | 620.xx | Noninflammatory disorders of ovary, fallopian tube, and broad ligament            |
|                                 | 620.0  | Follicular cyst of ovary                                                          |
|                                 | 620.1  | Corpus luteum cyst or hematoma                                                    |
|                                 | 620.2  | Other and unspecified ovarian cyst                                                |
|                                 | 620.3  | Acquired atrophy of ovary and fallopian tube                                      |
|                                 | 620.4  | Prolapse or hernia of ovary and fallopian tube                                    |
|                                 | 620.5  | Torsion of ovary, ovarian pedicle, or fallopian tube                              |
|                                 | 620.6  | Broad ligament laceration syndrome                                                |
|                                 | 620.7  | Hematoma of broad ligament                                                        |
|                                 | 620.8  | Other noninflammatory disorders of ovary, fallopian tube, and broad ligament      |
|                                 | 620.9  | Unspecified noninflammatory disorder of ovary, fallopian tube, and broad ligament |
|                                 | 622.xx | Noninflammatory disorders of cervix                                               |
|                                 | 622.0  | Erosion and ectropion of cervix                                                   |
|                                 | 622.1  | Dysplasia of cervix (uteri)                                                       |
|                                 | 622.10 | Dysplasia of cervix, unspecified                                                  |
|                                 | 622.11 | Mild dysplasia of cervix                                                          |
|                                 | 622.12 | Moderate dysplasia of cervix                                                      |
|                                 | 622.2  | Leukoplakia of cervix (uteri)                                                     |
|                                 | 622.3  | Old laceration of cervix                                                          |
|                                 | 622.4  | Stricture and stenosis of cervix                                                  |
|                                 | 622.5  | Incompetence of cervix                                                            |
|                                 | 622.6  | Hypertrophic elongation of cervix                                                 |
|                                 | 622.7  | Mucous polyp of cervix                                                            |
|                                 | 622.8  | Other specified noninflammatory disorders of cervix                               |
|                                 | 622.9  | Unspecified noninflammatory disorder of cervix                                    |
|                                 | 623.5  | Leukorrhea, not specified as infective                                            |

Borah BJ, Yao X, Laughlin-Tommaso SK, Heien HC, Steward EA. Comparative effectiveness of uterine leiomyoma procedures using a large insurance claims database. *Obstet Gynecol* 2017; 130.

The authors provided this information as a supplement to their article.

©2017 American College of Obstetricians and Gynecologists.

|                                                         |                                                                                                                                       |                                                                                                                                                                                                                                                                                                                                                                                                                                                                                                        |
|---------------------------------------------------------|---------------------------------------------------------------------------------------------------------------------------------------|--------------------------------------------------------------------------------------------------------------------------------------------------------------------------------------------------------------------------------------------------------------------------------------------------------------------------------------------------------------------------------------------------------------------------------------------------------------------------------------------------------|
| <b>Endometriosis</b>                                    | 617.xx<br>617.0<br>617.1<br>617.2<br>617.3<br>617.4<br>617.5<br>617.6<br>617.8<br>617.9                                               | Endometriosis<br>Endometriosis of uterus<br>Endometriosis of ovary<br>Endometriosis of fallopian tube<br>Endometriosis of pelvic peritoneum<br>Endometriosis of rectovaginal septum and vagina<br>Endometriosis of intestine<br>Endometriosis in scar of skin<br>Endometriosis of other specified sites<br>Endometriosis, site unspecified                                                                                                                                                             |
| <b>Pregnancy</b>                                        | V22.x<br><br>V23.x<br>V27.x<br>630–633<br>634–639<br>640–649<br>650–659<br><br>660–669<br><br>670–677                                 | Normal pregnancy<br><br>Supervision of high-risk pregnancy<br>Outcome of delivery<br>Ectopic and molar pregnancy<br>Other pregnancy with abortive outcome<br>Complications mainly related to pregnancy<br>Normal delivery, and other indications for care in pregnancy, labor, and delivery<br><br>Complications occurring mainly in the course of labor and delivery<br><br>Complications of the puerperium                                                                                           |
| <b>Pregnancy/delivery</b>                               | V22.2<br><br>650                                                                                                                      | Pregnant state, incidental<br><br>Normal delivery                                                                                                                                                                                                                                                                                                                                                                                                                                                      |
| <b>Disorders of the uterus not elsewhere classified</b> | 621.xx<br><br>621.0<br>621.1<br>621.2<br>621.3<br>621.30<br>621.31<br>621.32<br>621.33<br>621.34<br>621.35<br>621.4<br>621.5<br>621.6 | Disorders of uterus, not elsewhere classified<br><br>Polyp of corpus uteri<br>Chronic subinvolution of uterus<br>Hypertrophy of uterus<br>Endometrial hyperplasia<br>Endometrial hyperplasia, unspecified<br>Simple endometrial hyperplasia without atypia<br>Complex endometrial hyperplasia without atypia<br>Endometrial hyperplasia with atypia<br>Benign endometrial hyperplasia<br>Endometrial intraepithelial neoplasia [EIN]<br>Hematometra<br>Intrauterine synechiae<br>Malposition of uterus |

Borah BJ, Yao X, Laughlin-Tommaso SK, Heien HC, Steward EA. Comparative effectiveness of uterine leiomyoma procedures using a large insurance claims database. *Obstet Gynecol* 2017; 130.

The authors provided this information as a supplement to their article.

©2017 American College of Obstetricians and Gynecologists.

|                                            |                   |                                                                     |
|--------------------------------------------|-------------------|---------------------------------------------------------------------|
|                                            | 621.7             | Chronic inversion of uterus                                         |
|                                            | 621.8             | Other specified disorders of uterus, not elsewhere classified       |
|                                            | 621.9             | Unspecified disorder of uterus                                      |
| <b>Genital prolapse</b>                    | 618.xx            | Genital prolapse                                                    |
|                                            | 618.0             | Prolapse of vaginal walls without mention of uterine prolapse       |
|                                            | 618.00            | Unspecified prolapse of vaginal walls                               |
|                                            | 618.01            | Cystocele, midline                                                  |
|                                            | 618.02            | Cystocele, lateral                                                  |
|                                            | 618.03            | Urethrocele                                                         |
|                                            | 618.04            | Rectocele                                                           |
|                                            | 618.05            | Perineocele                                                         |
|                                            | 618.09            | Other prolapse of vaginal walls without mention of uterine prolapse |
|                                            | 618.1             | Uterine prolapse without mention of vaginal wall prolapse           |
|                                            | 618.2             | Uterovaginal prolapse, incomplete                                   |
|                                            | 618.3             | Uterovaginal prolapse, complete                                     |
|                                            | 618.4             | Uterovaginal prolapse, unspecified                                  |
|                                            | 618.5             | Prolapse of vaginal vault after hysterectomy                        |
|                                            | 618.6             | Vaginal enterocele, congenital or acquired                          |
|                                            | 618.7             | Old laceration of muscles of pelvic floor                           |
|                                            | 618.8             | Other specified genital prolapse                                    |
|                                            | 618.81            | Incompetence or weakening of pubocervical tissue                    |
|                                            | 618.82            | Incompetence or weakening of rectovaginal tissue                    |
|                                            | 618.83            | Pelvic muscle wasting                                               |
|                                            | 618.84            | Cervical stump prolapse                                             |
|                                            | 618.89            | Other specified genital prolapse                                    |
|                                            | 618.9             | Unspecified genital prolapse                                        |
| <b>Benign neoplasm of the uterus/ovary</b> | 220               | Benign neoplasm of ovary                                            |
|                                            | 219               | Other benign neoplasm of uterus                                     |
|                                            | 219.0             | Benign neoplasm of cervix uteri                                     |
|                                            | 219.1             | Benign neoplasm of corpus uteri                                     |
|                                            | 219.8             | Benign neoplasm of other specified parts of uterus                  |
|                                            | 219.9             | Benign neoplasm of uterus, part unspecified                         |
| <b>Sepsis</b>                              | 038.0x-<br>038.9x | Septicemia                                                          |
|                                            | 038.0             | Streptococcal septicemia                                            |

Borah BJ, Yao X, Laughlin-Tommaso SK, Heien HC, Steward EA. Comparative effectiveness of uterine leiomyoma procedures using a large insurance claims database. *Obstet Gynecol* 2017; 130.

The authors provided this information as a supplement to their article.

©2017 American College of Obstetricians and Gynecologists.

|                                |        |                                                                                     |
|--------------------------------|--------|-------------------------------------------------------------------------------------|
|                                | 038.1  | Staphylococcal septicemia                                                           |
|                                | 038.10 | Staphylococcal septicemia, unspecified                                              |
|                                | 038.11 | Methicillin susceptible <i>Staphylococcus aureus</i> septicemia                     |
|                                | 038.12 | Methicillin resistant <i>Staphylococcus aureus</i> septicemia                       |
|                                | 038.19 | Other staphylococcal septicemia                                                     |
|                                | 038.2  | Pneumococcal septicemia [ <i>Streptococcus pneumoniae</i> septicemia]               |
|                                | 038.3  | Septicemia due to anaerobes                                                         |
|                                | 038.4  | Septicemia due to other gram-negative organisms                                     |
|                                | 038.40 | Septicemia due to gram-negative organism, unspecified                               |
|                                | 038.41 | Septicemia due to hemophilus influenzae [ <i>H. influenzae</i> ]                    |
|                                | 038.42 | Septicemia due to escherichia coli [ <i>E. coli</i> ]                               |
|                                | 038.43 | Septicemia due to pseudomonas                                                       |
|                                | 038.44 | Septicemia due to serratia                                                          |
|                                | 038.49 | Other septicemia due to gram-negative organisms                                     |
|                                | 038.8  | Other specified septicemias                                                         |
|                                | 038.9  | Unspecified septicemia                                                              |
|                                | 670.2  | Puerperal sepsis                                                                    |
|                                | 995.91 | Sepsis                                                                              |
|                                | 995.92 | Severe sepsis                                                                       |
| <b>Intestinal obstructions</b> | 537.3  | Other obstruction of duodenum                                                       |
|                                | 560.89 | Other specified intestinal obstruction                                              |
|                                | 560    | Intestinal obstruction without mention of hernia                                    |
|                                | 560.0  | Intussusception                                                                     |
|                                | 560.8  | Other specified intestinal obstruction                                              |
|                                | 560.81 | Intestinal or peritoneal adhesions with obstruction (postoperative) (postinfection) |
|                                | 560.9  | Unspecified intestinal obstruction                                                  |
| <b>Peritonitis</b>             | 567.xx | Peritonitis and retroperitoneal infections                                          |
|                                | 567.0  | Peritonitis in infectious diseases classified elsewhere                             |
|                                | 567.1  | Pneumococcal peritonitis                                                            |
|                                | 567.2  | Other suppurative peritonitis                                                       |
|                                | 567.21 | Peritonitis (acute) generalized                                                     |
|                                | 567.22 | Peritoneal abscess                                                                  |
|                                | 567.23 | Spontaneous bacterial peritonitis                                                   |
|                                | 567.29 | Other suppurative peritonitis                                                       |

Borah BJ, Yao X, Laughlin-Tommaso SK, Heien HC, Steward EA. Comparative effectiveness of uterine leiomyoma procedures using a large insurance claims database. *Obstet Gynecol* 2017; 130.

The authors provided this information as a supplement to their article.

©2017 American College of Obstetricians and Gynecologists.

|                             |        |                                                                                      |
|-----------------------------|--------|--------------------------------------------------------------------------------------|
|                             | 567.3  | Retroperitoneal infections                                                           |
|                             | 567.31 | Psoas muscle abscess                                                                 |
|                             | 567.38 | Other retroperitoneal abscess                                                        |
|                             | 567.39 | Other retroperitoneal infections                                                     |
|                             | 567.8  | Other specified peritonitis                                                          |
|                             | 567.81 | Choleperitonitis                                                                     |
|                             | 567.82 | Sclerosing mesenteritis                                                              |
|                             | 567.89 | Other specified peritonitis                                                          |
|                             | 567.9  | Unspecified peritonitis                                                              |
|                             | 098.86 | Gonococcal peritonitis                                                               |
|                             | 614.5  | Acute or unspecified pelvic peritonitis, female                                      |
|                             | 614.7  | Other chronic pelvic peritonitis, female                                             |
| <b>Spontaneous abortion</b> | 634.X  | Spontaneous abortion                                                                 |
|                             | 634.0  | Spontaneous abortion; complicated by genital tract and pelvic infection              |
|                             | 634.00 | Spontaneous abortion, complicated by genital tract and pelvic infection, unspecified |
|                             | 634.01 | Spontaneous abortion, complicated by genital tract and pelvic infection, incomplete  |
|                             | 634.02 | Spontaneous abortion, complicated by genital tract and pelvic infection, complete    |
|                             | 634.1  | Spontaneous abortion; complicated by delayed or excessive hemorrhage                 |
|                             | 634.10 | Spontaneous abortion, complicated by delayed or excessive hemorrhage, unspecified    |
|                             | 634.11 | Spontaneous abortion, complicated by delayed or excessive hemorrhage, incomplete     |
|                             | 634.12 | Spontaneous abortion, complicated by delayed or excessive hemorrhage, complete       |
|                             | 634.2  | Spontaneous abortion; complicated by damage to pelvic organs or tissues              |
|                             | 634.20 | Spontaneous abortion, complicated by damage to pelvic organs or tissues, unspecified |
|                             | 634.21 | Spontaneous abortion, complicated by damage to pelvic organs or tissues, incomplete  |
|                             | 634.22 | Spontaneous abortion, complicated by damage to pelvic organs or tissues, complete    |
|                             | 634.3  | Spontaneous abortion; complicated by renal failure                                   |
|                             | 634.30 | Spontaneous abortion, complicated by renal failure, unspecified                      |

Borah BJ, Yao X, Laughlin-Tommaso SK, Heien HC, Steward EA. Comparative effectiveness of uterine leiomyoma procedures using a large insurance claims database. *Obstet Gynecol* 2017; 130.

The authors provided this information as a supplement to their article.

©2017 American College of Obstetricians and Gynecologists.



|        |                                                                       |
|--------|-----------------------------------------------------------------------|
| 634.31 | Spontaneous abortion, complicated by renal failure, incomplete        |
| 634.32 | Spontaneous abortion, complicated by renal failure, complete          |
| 634.4  | Spontaneous abortion; complicated by metabolic disorder               |
| 634.40 | Spontaneous abortion, complicated by metabolic disorder, unspecified  |
| 634.41 | Spontaneous abortion, complicated by metabolic disorder, incomplete   |
| 634.42 | Spontaneous abortion, complicated by metabolic disorder, complete     |
| 634.5  | Spontaneous abortion; complicated by shock                            |
| 634.50 | Spontaneous abortion, complicated by shock, unspecified               |
| 634.51 | Spontaneous abortion, complicated by shock, incomplete                |
| 634.52 | Spontaneous abortion, complicated by shock, complete                  |
| 634.6  | Spontaneous abortion; complicated by embolism                         |
| 634.60 | Spontaneous abortion, complicated by embolism, unspecified            |
| 634.61 | Spontaneous abortion, complicated by embolism, incomplete             |
| 634.62 | Spontaneous abortion, complicated by embolism, complete               |
| 634.7  | Spontaneous abortion; with other specified complications              |
| 634.70 | Spontaneous abortion, with other specified complications, unspecified |
| 634.71 | Spontaneous abortion, with other specified complications, incomplete  |
| 634.72 | Spontaneous abortion, with other specified complications, complete    |
| 634.8  | Spontaneous abortion; with unspecified complication                   |
| 634.80 | Spontaneous abortion, with unspecified complication, unspecified      |
| 634.81 | Spontaneous abortion, with unspecified complication, incomplete       |

Borah BJ, Yao X, Laughlin-Tommaso SK, Heien HC, Steward EA. Comparative effectiveness of uterine leiomyoma procedures using a large insurance claims database. *Obstet Gynecol* 2017; 130.

The authors provided this information as a supplement to their article.

©2017 American College of Obstetricians and Gynecologists.

|                             |        |                                                                                          |
|-----------------------------|--------|------------------------------------------------------------------------------------------|
|                             | 634.82 | Spontaneous abortion, with unspecified complication, complete                            |
|                             | 634.9  | Spontaneous abortion; without mention of complication                                    |
|                             | 634.90 | Spontaneous abortion, without mention of complication, unspecified                       |
|                             | 634.91 | Spontaneous abortion, without mention of complication, incomplete                        |
|                             | 634.92 | Spontaneous abortion, without mention of complication, complete                          |
| <b>Therapeutic abortion</b> | 635.X  | Legally induced abortion                                                                 |
|                             | 635.0  | Legally induced abortion; complicated by genital tract and pelvic infection              |
|                             | 635.00 | Legally induced abortion, complicated by genital tract and pelvic infection, unspecified |
|                             | 635.01 | Legally induced abortion, complicated by genital tract and pelvic infection, incomplete  |
|                             | 635.02 | Legally induced abortion, complicated by genital tract and pelvic infection, complete    |
|                             | 635.1  | Legally induced abortion; complicated by delayed or excessive hemorrhage                 |
|                             | 635.10 | Legally induced abortion, complicated by delayed or excessive hemorrhage, unspecified    |
|                             | 635.11 | Legally induced abortion, complicated by delayed or excessive hemorrhage, incomplete     |
|                             | 635.12 | Legally induced abortion, complicated by delayed or excessive hemorrhage, complete       |
|                             | 635.2  | Legally induced abortion; complicated by damage to pelvic organs or tissues              |
|                             | 635.20 | Legally induced abortion, complicated by damage to pelvic organs or tissues, unspecified |
|                             | 635.21 | Legally induced abortion, complicated by damage to pelvic organs or tissues, incomplete  |
|                             | 635.22 | Legally induced abortion, complicated by damage to pelvic organs or tissues, complete    |
|                             | 635.3  | Legally induced abortion; complicated by renal failure                                   |
|                             | 635.30 | Legally induced abortion, complicated by renal failure, unspecified                      |
|                             | 635.31 | Legally induced abortion, complicated by renal failure, incomplete                       |

Borah BJ, Yao X, Laughlin-Tommaso SK, Heien HC, Steward EA. Comparative effectiveness of uterine leiomyoma procedures using a large insurance claims database. *Obstet Gynecol* 2017; 130.

The authors provided this information as a supplement to their article.

©2017 American College of Obstetricians and Gynecologists.

|        |                                                                           |
|--------|---------------------------------------------------------------------------|
| 635.32 | Legally induced abortion, complicated by renal failure, complete          |
| 635.4  | Legally induced abortion; complicated by metabolic disorder               |
| 635.40 | Legally induced abortion, complicated by metabolic disorder, unspecified  |
| 635.41 | Legally induced abortion, complicated by metabolic disorder, incomplete   |
| 635.42 | Legally induced abortion, complicated by metabolic disorder, complete     |
| 635.5  | Legally induced abortion; complicated by shock                            |
| 635.50 | Legally induced abortion, complicated by shock, unspecified               |
| 635.51 | Legally induced abortion, complicated by shock, incomplete                |
| 635.52 | Legally induced abortion, complicated by shock, complete                  |
| 635.6  | Legally induced abortion; complicated by embolism                         |
| 635.60 | Legally induced abortion, complicated by embolism, unspecified            |
| 635.61 | Legally induced abortion, complicated by embolism, incomplete             |
| 635.62 | Legally induced abortion, complicated by embolism, complete               |
| 635.7  | Legally induced abortion; with other specified complications              |
| 635.70 | Legally induced abortion, with other specified complications, unspecified |
| 635.71 | Legally induced abortion, with other specified complications, incomplete  |
| 635.72 | Legally induced abortion, with other specified complications, complete    |
| 635.8  | Legally induced abortion; with unspecified complication                   |
| 635.80 | Legally induced abortion, with unspecified complication, unspecified      |
| 635.81 | Legally induced abortion, with unspecified complication, incomplete       |
| 635.82 | Legally induced abortion, with unspecified complication, complete         |

Borah BJ, Yao X, Laughlin-Tommaso SK, Heien HC, Steward EA. Comparative effectiveness of uterine leiomyoma procedures using a large insurance claims database. *Obstet Gynecol* 2017; 130.

The authors provided this information as a supplement to their article.

©2017 American College of Obstetricians and Gynecologists.

|                          |        |                                                                                      |
|--------------------------|--------|--------------------------------------------------------------------------------------|
|                          | 635.9  | Legally induced abortion; without mention of complication                            |
|                          | 635.90 | Legally induced abortion, without mention of complication, unspecified               |
|                          | 635.91 | Legally induced abortion, without mention of complication, incomplete                |
|                          | 635.92 | Legally induced abortion, without mention of complication, complete                  |
| <b>Ectopic pregnancy</b> | 633    | Ectopic pregnancy                                                                    |
|                          | 633.0  | Abdominal pregnancy                                                                  |
|                          | 633.00 | Abdominal pregnancy without intrauterine pregnancy                                   |
|                          | 633.01 | Abdominal pregnancy with intrauterine pregnancy                                      |
|                          | 633.1  | Tubal pregnancy                                                                      |
|                          | 633.10 | Tubal pregnancy without intrauterine pregnancy                                       |
|                          | 633.11 | Tubal pregnancy with intrauterine pregnancy                                          |
|                          | 633.2  | Ovarian pregnancy                                                                    |
|                          | 633.20 | Ovarian pregnancy without intrauterine pregnancy                                     |
|                          | 633.21 | Ovarian pregnancy with intrauterine pregnancy                                        |
|                          | 633.8  | Other ectopic pregnancy                                                              |
|                          | 633.80 | Other ectopic pregnancy without intrauterine pregnancy                               |
|                          | 633.81 | Other ectopic pregnancy with intrauterine pregnancy                                  |
|                          | 633.9  | Unspecified ectopic pregnancy                                                        |
|                          | 633.90 | Unspecified ectopic pregnancy without intrauterine pregnancy                         |
|                          | 633.91 | Unspecified ectopic pregnancy with intrauterine pregnancy                            |
| <b>Cesarean section</b>  | 669.7  | Cesarean delivery, without mention of indication                                     |
|                          | 654.1  | Tumors of body of uterus                                                             |
|                          | 654.10 | Tumors of body of uterus, unspecified as to episode of care or not applicable        |
|                          | 654.11 | Tumors of body of uterus, delivered, with or without mention of antepartum condition |
|                          | 654.12 | Tumors of body of uterus, delivered, with mention of postpartum complication         |
|                          | 654.13 | Tumors of body of uterus, antepartum condition or complication                       |
|                          | 654.14 | Tumors of body of uterus, postpartum condition or complication                       |
|                          | 654.3  | Retroverted and incarcerated gravid uterus                                           |

Borah BJ, Yao X, Laughlin-Tommaso SK, Heien HC, Steward EA. Comparative effectiveness of uterine leiomyoma procedures using a large insurance claims database. *Obstet Gynecol* 2017; 130.

The authors provided this information as a supplement to their article.

©2017 American College of Obstetricians and Gynecologists.

|        |                                                                                                                                    |
|--------|------------------------------------------------------------------------------------------------------------------------------------|
| 654.30 | Retroverted and incarcerated gravid uterus, unspecified as to episode of care or not applicable                                    |
| 654.31 | Retroverted and incarcerated gravid uterus, delivered, with mention of antepartum condition                                        |
| 654.32 | Retroverted and incarcerated gravid uterus, delivered, with mention of postpartum complication                                     |
| 654.33 | Retroverted and incarcerated gravid uterus, antepartum condition or complication                                                   |
| 654.34 | Retroverted and incarcerated gravid uterus, postpartum condition or complication                                                   |
| 654.81 | Congenital or acquired abnormality of vulva, delivered, with or without mention of antepartum condition                            |
| 654.82 | Congenital or acquired abnormality of vulva, delivered, with mention of postpartum complication                                    |
| 654.83 | Congenital or acquired abnormality of vulva, antepartum condition or complication                                                  |
| 654.84 | Congenital or acquired abnormality of vulva, postpartum condition or complication                                                  |
| 654.9  | Abnormality of organs and soft tissues of pelvis; other and unspecified                                                            |
| 654.90 | Other and unspecified abnormality of organs and soft tissues of pelvis, unspecified as to episode of care or not applicable        |
| 654.91 | Other and unspecified abnormality of organs and soft tissues of pelvis, delivered, with or without mention of antepartum condition |
| 654.92 | Other and unspecified abnormality of organs and soft tissues of pelvis, delivered, with mention of postpartum complication         |
| 654.93 | Other and unspecified abnormality of organs and soft tissues of pelvis, antepartum condition or complication                       |
| 654.94 | Other and unspecified abnormality of organs and soft tissues of pelvis, postpartum condition or complication                       |

Borah BJ, Yao X, Laughlin-Tommaso SK, Heien HC, Steward EA. Comparative effectiveness of uterine leiomyoma procedures using a large insurance claims database. *Obstet Gynecol* 2017; 130.

The authors provided this information as a supplement to their article.

©2017 American College of Obstetricians and Gynecologists.

**Appendix 2. List of Procedure Codes**

|                                     | <b>CPT code</b> | <b>ICD9 Procedure Code</b> | <b>Description</b>                                                                                                                                                                                                                                                                                                                              |
|-------------------------------------|-----------------|----------------------------|-------------------------------------------------------------------------------------------------------------------------------------------------------------------------------------------------------------------------------------------------------------------------------------------------------------------------------------------------|
| <b>Focused ultrasound ablation</b>  | 0071T           |                            | Focused ultrasound ablation of uterine leiomyomata, including MR guidance; total leiomyomata volume less than 200 cc of tissue                                                                                                                                                                                                                  |
|                                     | 0072T           |                            | Focused ultrasound ablation of uterine leiomyomata, including MR guidance; total leiomyomata volume greater or equal to 200 cc of tissue                                                                                                                                                                                                        |
|                                     | C9734           |                            | Focused ultrasound ablation/therapeutic intervention, other than uterine leiomyomata, with magnetic resonance (MR) guidance                                                                                                                                                                                                                     |
| <b>Uterine artery embolization</b>  | 36247           |                            | Selective catheter placement, arterial system; initial third order or more selective abdominal, pelvic, or lower extremity artery branch, within a vascular family                                                                                                                                                                              |
|                                     | 37204           |                            | Transcatheter occlusion or embolization (eg, for tumor destruction, to achieve hemostasis, to occlude a vascular malformation), percutaneous, any method, non-central nervous system, non-head or neck                                                                                                                                          |
|                                     | S2250           |                            | Uterine artery embolization for uterine fibroids                                                                                                                                                                                                                                                                                                |
| <b>Hysterectomy</b>                 | 58150           | 68.24                      | Uterine fibroid embolization (UFE, embolization of the uterine arteries to treat uterine fibroids, leiomyomata), percutaneous approach inclusive of vascular access, vessel selection, embolization, and all radiological supervision and interpretation, intraprocedural roadmapping, and imaging guidance necessary to complete the procedure |
|                                     |                 | 68.25                      | Uterine artery embolization [UAE] with coils<br>Uterine artery embolization [UAE] without coils                                                                                                                                                                                                                                                 |
| <b>Total abdominal hysterectomy</b> | 58152           |                            | Total abdominal hysterectomy (corpus and cervix), with or without removal of tube(s), with or without removal of ovary(s)<br>Total abdominal hysterectomy (corpus and cervix), with or without removal of tube(s), with or without removal of ovary(s); with colpo-urethrocystopexy (eg, Marshall-Marchetti-Krantz, Burch)                      |

Borah BJ, Yao X, Laughlin-Tommaso SK, Heien HC, Steward EA. Comparative effectiveness of uterine leiomyoma procedures using a large insurance claims database. *Obstet Gynecol* 2017; 130.

The authors provided this information as a supplement to their article.

©2017 American College of Obstetricians and Gynecologists.

|                             |       |                                                                                                                                                                                          |
|-----------------------------|-------|------------------------------------------------------------------------------------------------------------------------------------------------------------------------------------------|
|                             | 58200 | Total abdominal hysterectomy, including partial vaginectomy, with para-aortic and pelvic lymph node sampling, with or without removal of tube(s), with or without removal of ovary(s)    |
|                             | 58953 | Bilateral salpingo-oophorectomy with omentectomy, total abdominal hysterectomy and radical dissection for debulking                                                                      |
|                             | 58954 | Bilateral salpingo-oophorectomy with omentectomy, total abdominal hysterectomy and radical dissection for debulking; with pelvic lymphadenectomy and limited para-aortic lymphadenectomy |
|                             | 58956 | Bilateral salpingo-oophorectomy with total omentectomy, total abdominal hysterectomy for malignancy                                                                                      |
|                             |       | 68.4 Total abdominal hysterectomy                                                                                                                                                        |
|                             |       | 68.49 Other and unspecified total abdominal hysterectomy                                                                                                                                 |
| <b>Vaginal hysterectomy</b> | 58260 | Vaginal hysterectomy, for uterus 250 g or less;                                                                                                                                          |
|                             | 58262 | Vaginal hysterectomy, for uterus 250 g or less; with removal of tube(s), and/or ovary(s)                                                                                                 |
|                             | 58263 | Vaginal hysterectomy, for uterus 250 g or less; with removal of tube(s), and/or ovary(s), with repair of enterocele                                                                      |
|                             | 58267 | Vaginal hysterectomy, for uterus 250 g or less; with colpo-urethrocystopexy (Marshall-Marchetti-Krantz type, Pereyra type) with or without endoscopic control                            |
|                             | 58270 | Vaginal hysterectomy, for uterus 250 g or less; with repair of enterocele                                                                                                                |
|                             | 58275 | Vaginal hysterectomy, with total or partial vaginectomy;                                                                                                                                 |
|                             | 58280 | Vaginal hysterectomy, with total or partial vaginectomy; with repair of enterocele                                                                                                       |
|                             | 58285 | Vaginal hysterectomy, radical (Schauta type operation)                                                                                                                                   |
|                             | 58290 | Vaginal hysterectomy, for uterus greater than 250 g;                                                                                                                                     |
|                             | 58291 | Vaginal hysterectomy, for uterus greater than 250 g; with removal of tube(s) and/or ovary(s)                                                                                             |

Borah BJ, Yao X, Laughlin-Tommaso SK, Heien HC, Steward EA. Comparative effectiveness of uterine leiomyoma procedures using a large insurance claims database. *Obstet Gynecol* 2017; 130.

The authors provided this information as a supplement to their article.

©2017 American College of Obstetricians and Gynecologists.

|                             |       |       |                                                                                                                                                                   |
|-----------------------------|-------|-------|-------------------------------------------------------------------------------------------------------------------------------------------------------------------|
|                             | 58292 |       | Vaginal hysterectomy, for uterus greater than 250 g; with removal of tube(s) and/or ovary(s), with repair of enterocele                                           |
|                             | 58293 |       | Vaginal hysterectomy, for uterus greater than 250 g; with colpo-urethrocytopexy (Marshall-Marchetti-Krantz type, Pereyra type) with or without endoscopic control |
|                             | 58294 |       | Vaginal hysterectomy, for uterus greater than 250 g; with repair of enterocele                                                                                    |
|                             |       | 68.5  | Vaginal hysterectomy                                                                                                                                              |
|                             |       | 68.59 | Other and unspecified vaginal hysterectomy                                                                                                                        |
| <b>Laparoscopic/robotic</b> | 58541 |       | Laparoscopy, surgical, supracervical hysterectomy, for uterus 250 g or less;                                                                                      |
|                             | 58542 |       | Laparoscopy, surgical, supracervical hysterectomy, for uterus 250 g or less; with removal of tube(s) and/or ovary(s)                                              |
|                             | 58543 |       | Laparoscopy, surgical, supracervical hysterectomy, for uterus greater than 250 g;                                                                                 |
|                             | 58544 |       | Laparoscopy, surgical, supracervical hysterectomy, for uterus greater than 250 g; with removal of tube(s) and/or ovary(s)                                         |
|                             | 58550 |       | Laparoscopy, surgical, with vaginal hysterectomy, for uterus 250 g or less;                                                                                       |
|                             | 58552 |       | Laparoscopy, surgical, with vaginal hysterectomy, for uterus 250 g or less; with removal of tube(s) and/or ovary(s)                                               |
|                             | 58553 |       | Laparoscopy, surgical, with vaginal hysterectomy, for uterus greater than 250 g;                                                                                  |
|                             | 58554 |       | Laparoscopy, surgical, with vaginal hysterectomy, for uterus greater than 250 g; with removal of tube(s) and/or ovary(s)                                          |
|                             | 58570 |       | Laparoscopy, surgical, with total hysterectomy, for uterus 250 g or less;                                                                                         |
|                             | 58571 |       | Laparoscopy, surgical, with total hysterectomy, for uterus 250 g or less; with removal of tube(s) and/or ovary(s)                                                 |
|                             | 58572 |       | Laparoscopy, surgical, with total hysterectomy, for uterus greater than 250 g;                                                                                    |

Borah BJ, Yao X, Laughlin-Tommaso SK, Heien HC, Steward EA. Comparative effectiveness of uterine leiomyoma procedures using a large insurance claims database. *Obstet Gynecol* 2017; 130.

The authors provided this information as a supplement to their article.

©2017 American College of Obstetricians and Gynecologists.



|                              |       |       |                                                                                                                                                                                                   |
|------------------------------|-------|-------|---------------------------------------------------------------------------------------------------------------------------------------------------------------------------------------------------|
|                              | 58573 |       | Laparoscopy, surgical, with total hysterectomy, for uterus greater than 250 g; with removal of tube(s) and/or ovary(s)                                                                            |
|                              | 58578 |       | Unlisted laparoscopy procedure, uterus                                                                                                                                                            |
|                              | S2078 |       | Laparoscopic supracervical hysterectomy (subtotal hysterectomy), with or without removal of tube(s), with or without removal of ovary(s)                                                          |
|                              |       | 68.41 | Laparoscopic total abdominal hysterectomy                                                                                                                                                         |
|                              |       | 68.51 | Laparoscopically assisted vaginal hysterectomy (LAVH)                                                                                                                                             |
|                              |       | 68.31 | Laparoscopic supracervical hysterectomy [LSH]                                                                                                                                                     |
|                              |       |       | Supracervical abdominal hysterectomy (subtotal hysterectomy), with or without removal of tube(s), with or without removal of ovary(s)                                                             |
| <b>Subtotal hysterectomy</b> | 58180 | 68.3  | Subtotal abdominal hysterectomy                                                                                                                                                                   |
|                              |       | 68.39 | Other and unspecified subtotal abdominal hysterectomy                                                                                                                                             |
| <b>Radical hysterectomy</b>  | 58210 |       | Radical abdominal hysterectomy, with bilateral total pelvic lymphadenectomy and para-aortic lymph node sampling (biopsy), with or without removal of tube(s), with or without removal of ovary(s) |
|                              | 58548 |       | Laparoscopy, surgical, with radical hysterectomy, with bilateral total pelvic lymphadenectomy and para-aortic lymph node sampling (biopsy), with removal of tube(s) and ovary(s), if performed    |
|                              |       | 68.6  | Radical abdominal hysterectomy                                                                                                                                                                    |
|                              |       | 68.61 | Laparoscopic radical abdominal hysterectomy                                                                                                                                                       |
|                              |       | 68.69 | Other and unspecified radical abdominal hysterectomy                                                                                                                                              |
|                              |       | 68.7  | Radical vaginal hysterectomy                                                                                                                                                                      |
|                              |       | 68.71 | Laparoscopic radical vaginal hysterectomy [LRVH]                                                                                                                                                  |
|                              |       | 68.79 | Other and unspecified radical vaginal hysterectomy                                                                                                                                                |
|                              |       | 68.9  | Other and unspecified hysterectomy                                                                                                                                                                |
| <b>Myomectomy</b>            |       |       |                                                                                                                                                                                                   |

Borah BJ, Yao X, Laughlin-Tommaso SK, Heien HC, Steward EA. Comparative effectiveness of uterine leiomyoma procedures using a large insurance claims database. *Obstet Gynecol* 2017; 130.

The authors provided this information as a supplement to their article.

©2017 American College of Obstetricians and Gynecologists.

|                                                        |       |       |                                                                                                                                                                        |
|--------------------------------------------------------|-------|-------|------------------------------------------------------------------------------------------------------------------------------------------------------------------------|
| <b>Abdominal myomectomy</b>                            | 58140 |       | Myomectomy, excision of fibroid tumor(s) of uterus, 1 to 4 intramural myoma(s) with total weight of 250 g or less and/or removal of surface myomas; abdominal approach |
|                                                        | 58146 |       | Myomectomy, excision of fibroid tumor(s) of uterus, 5 or more intramural myomas and/or intramural myomas with total weight greater than 250 g, abdominal approach      |
| <b>Vaginal myomectomy</b>                              | 58145 |       | Myomectomy, excision of fibroid tumor(s) of uterus, 1 to 4 intramural myoma(s) with total weight of 250 g or less and/or removal of surface myomas; vaginal approach   |
| <b>Laparoscopy myomectomy</b>                          | 58545 |       | Laparoscopy, surgical, myomectomy, excision; 1 to 4 intramural myomas with total weight of 250 g or less and/or removal of surface myomas                              |
|                                                        | 58546 |       | Laparoscopy, surgical, myomectomy, excision; 5 or more intramural myomas and/or intramural myomas with total weight greater than 250 g                                 |
|                                                        | 58551 |       | This description expired on 2003, replaced by 58545 and 58546                                                                                                          |
| <b>Subsequent procedures (Potential Complications)</b> |       | 68.29 | Other excision or destruction of lesion of uterus                                                                                                                      |
|                                                        |       | 42.x  | Operations on esophagus                                                                                                                                                |
|                                                        |       | 43.x  | Incision and excision of stomach                                                                                                                                       |
|                                                        |       | 44.x  | Other operations on stomach                                                                                                                                            |
|                                                        |       | 45.x  | Incision, excision, and anastomosis of intestine                                                                                                                       |
|                                                        |       | 46.x  | Other operations on intestine                                                                                                                                          |
|                                                        |       | 47.x  | Operations on appendix                                                                                                                                                 |
|                                                        |       | 48.x  | Operations on rectum, rectosigmoid and perirectal tissue                                                                                                               |
|                                                        |       | 49.x  | Operations on anus                                                                                                                                                     |
|                                                        |       | 50.x  | Operations on liver                                                                                                                                                    |

Borah BJ, Yao X, Laughlin-Tommaso SK, Heien HC, Steward EA. Comparative effectiveness of uterine leiomyoma procedures using a large insurance claims database. *Obstet Gynecol* 2017; 130.

The authors provided this information as a supplement to their article.

©2017 American College of Obstetricians and Gynecologists.

|  |      |                                                      |
|--|------|------------------------------------------------------|
|  | 51.x | Operations on gallbladder and biliary tract          |
|  | 52.x | Operations on pancreas                               |
|  | 54.x | Other operations on abdominal region                 |
|  | 55.x | Operations on kidney                                 |
|  | 56.x | Operations on ureter                                 |
|  | 57.x | Operations on urinary bladder                        |
|  | 58.x | Operations on urethra                                |
|  | 59.x | Other operations on urinary tract                    |
|  | 65.x | Operations on ovary                                  |
|  | 66.x | Operations on fallopian tubes                        |
|  | 68.x | Other incision and excision of uterus                |
|  | 69.x | Other operations on uterus and supporting structures |

**Appendix 3. Patient Baseline Characteristics Including the Magnetic Resonance–Guided, Focused Ultrasound Surgery Cohort, Stratified by Index Procedure (N=135,522)**

|                              | MRgFUS     | Myomectomy     | UAE          | Hysterectomy    | Overall       | p-value |
|------------------------------|------------|----------------|--------------|-----------------|---------------|---------|
| <b>Patients, N (%)</b>       | 47 (0.0%)  | 19,965 (14.7%) | 4,186 (3.1%) | 111,324 (82.2%) | 135,522       |         |
| <b>Age, years, mean (SD)</b> | 43.0 (5.4) | 38.4 (6.6)     | 44.0 (5.4)   | 44.1 (5.5)      | 43.2 (6.0)    | <0.01   |
| <b>Race, N (%)</b>           |            |                |              |                 |               | <0.01   |
| Asian                        | 0 (0.0%)   | 714 (3.6%)     | 106 (2.5%)   | 1762 (1.6%)     | 2582 (1.9%)   |         |
| Black                        | 4 (8.5%)   | 2744 (13.7%)   | 823 (19.7%)  | 9528 (8.6%)     | 13099 (9.7%)  |         |
| Hispanic                     | 3 (6.4%)   | 1564 (7.8%)    | 224 (5.4%)   | 8203 (7.4%)     | 9994 (7.4%)   |         |
| White                        | 21 (44.7%) | 8443 (42.3%)   | 1702 (40.7%) | 56747 (51.0%)   | 66913 (49.4%) |         |
| Unknown                      | 19 (40.4%) | 6500 (32.6%)   | 1331 (31.8%) | 35084 (31.5%)   | 42934 (31.7%) |         |
| <b>Income level, N (%)</b>   |            |                |              |                 |               | <0.01   |
| < \$40,000                   | 5 (10.6%)  | 2234 (11.2%)   | 490 (11.7%)  | 12743 (11.4%)   | 15472 (11.4%) |         |
| \$40,000 – \$49,999          | 0 (0.0%)   | 1695 (8.5%)    | 349 (8.3%)   | 11226 (10.1%)   | 13270 (9.8%)  |         |
| \$50,000 – \$59,999          | 4 (8.5%)   | 1621 (8.1%)    | 374 (8.9%)   | 10575 (9.5%)    | 12574 (9.3%)  |         |
| \$60,000 – \$74,999          | 7 (14.9%)  | 2119 (10.6%)   | 430 (10.3%)  | 12676 (11.4%)   | 15232 (11.2%) |         |
| \$75,000 – \$99,999          | 7 (14.9%)  | 2724 (13.6%)   | 562 (13.4%)  | 15048 (13.5%)   | 18341 (13.5%) |         |
| ≥ \$100,000                  | 6 (12.8%)  | 3198 (16.0%)   | 687 (16.4%)  | 14749 (13.2%)   | 18640 (13.8%) |         |
| Unknown                      | 18 (38.3%) | 6374 (31.9%)   | 1294 (30.9%) | 34307 (30.8%)   | 41993 (31.0%) |         |
| <b>Region, N (%)</b>         |            |                |              |                 |               | <0.01   |
| Midwest                      | 17 (36.2%) | 3516 (17.6%)   | 891 (21.3%)  | 27599 (24.8%)   | 32023 (23.6%) |         |
| Northeast                    | 4 (8.5%)   | 4538 (22.7%)   | 897 (21.4%)  | 9759 (8.8%)     | 15198 (11.2%) |         |
| South                        | 19 (40.4%) | 9301 (46.6%)   | 1924 (46.0%) | 57046 (51.2%)   | 68290 (50.4%) |         |
| West                         | 7 (14.9%)  | 2561 (12.8%)   | 467 (11.2%)  | 16565 (14.9%)   | 19600 (14.5%) |         |
| Unknown                      | 0 (0.0%)   | 49 (0.2%)      | 7 (0.2%)     | 355 (0.3%)      | 411 (0.3%)    |         |

Borah BJ, Yao X, Laughlin-Tommaso SK, Heien HC, Steward EA. Comparative effectiveness of uterine leiomyoma procedures using a large insurance claims database. *Obstet Gynecol* 2017; 130.

The authors provided this information as a supplement to their article.

©2017 American College of Obstetricians and Gynecologists.

|                                                    |             |               |              |               |               |       |
|----------------------------------------------------|-------------|---------------|--------------|---------------|---------------|-------|
| <b>Charlson Index at baseline, N (%)</b>           |             |               |              |               |               | <0.01 |
| 0                                                  | 37 (78.7%)  | 15031 (75.3%) | 2676 (63.9%) | 68990 (62.0%) | 86734 (64.0%) |       |
| 1                                                  | 8 (17.0%)   | 3539 (17.7%)  | 1026 (24.5%) | 28992 (26.0%) | 33565 (24.8%) |       |
| ≥2                                                 | 2 (4.3%)    | 1395 (7.0%)   | 484 (11.6%)  | 13342 (12.0%) | 15223 (11.2%) |       |
| <b>Baseline Comorbidities, N (%)</b>               |             |               |              |               |               |       |
| Pelvic pain                                        | 25 (53.2%)  | 13759 (68.9%) | 2636 (63.0%) | 71317 (64.1%) | 87737 (64.7%) | <0.01 |
| Anemias                                            | 12 (25.5%)  | 4416 (22.1%)  | 1470 (35.1%) | 24601 (22.1%) | 30499 (22.5%) | <0.01 |
| Inflammatory diseases                              | 1 (2.1%)    | 1058 (5.3%)   | 89 (2.1%)    | 5165 (4.6%)   | 6313 (4.7%)   | <0.01 |
| Noninflammatory diseases                           | 9 (19.1%)   | 6370 (31.9%)  | 1164 (27.8%) | 35362 (31.8%) | 42905 (31.7%) | <0.01 |
| Endometriosis                                      | 2 (4.3%)    | 1639 (8.2%)   | 161 (3.8%)   | 10634 (9.6%)  | 12436 (9.2%)  | <0.01 |
| Benign neoplasm of the uterus/ovary                | 1 (2.1%)    | 674 (3.4%)    | 132 (3.2%)   | 5258 (4.7%)   | 6065 (4.5%)   | <0.01 |
| Disorders of uterus                                | 12 (25.5%)  | 4201 (21.0%)  | 1097 (26.2%) | 25051 (22.5%) | 30361 (22.4%) | <0.01 |
| Urinary problems                                   | 14 (29.8%)  | 3597 (18.0%)  | 1045 (25.0%) | 23624 (21.2%) | 28280 (20.9%) | <0.01 |
| Constipation or gas                                | 4 (8.5%)    | 1891 (9.5%)   | 448 (10.7%)  | 9654 (8.7%)   | 11997 (8.9%)  | <0.01 |
| Dyspareunia                                        | 3 (6.4%)    | 1094 (5.5%)   | 158 (3.8%)   | 7178 (6.4%)   | 8433 (6.2%)   | <0.01 |
| Pregnancy                                          | 0 (0.0%)    | 2567 (12.9%)  | 195 (4.7%)   | 2999 (2.7%)   | 5761 (4.3%)   | <0.01 |
| <b>Baseline Health Care Utilization, Mean (SD)</b> |             |               |              |               |               |       |
| UF-Related Outpatient                              | 4.2 (3.4)   | 2.5 (2.7)     | 3.5 (2.4)    | 1.5 (1.8)     | 1.7 (2.0)     | <0.01 |
| UF-Related ED & Inpatient                          | 0.1 (0.3)   | 0.1 (0.4)     | 0.1 (0.4)    | 0.1 (0.3)     | 0.1 (0.3)     | <0.01 |
| Any Outpatient                                     | 15.5 (11.2) | 14.9 (12.8)   | 15.0 (13.0)  | 14.0 (12.1)   | 14.2 (12.2)   | <0.01 |
| Any ED & Inpatient                                 | 0.4 (0.6)   | 0.5 (1.1)     | 0.6 (1.2)    | 0.6 (1.4)     | 0.6 (1.3)     | <0.01 |

Borah BJ, Yao X, Laughlin-Tommaso SK, Heien HC, Steward EA. Comparative effectiveness of uterine leiomyoma procedures using a large insurance claims database. *Obstet Gynecol* 2017; 130.

The authors provided this information as a supplement to their article.

©2017 American College of Obstetricians and Gynecologists.

|                                                       |               |               |               |               |               |      |
|-------------------------------------------------------|---------------|---------------|---------------|---------------|---------------|------|
| <b>Follow-up time<br/>(# years), Median<br/>(IQR)</b> | 2.7 (1.2-6.1) | 2.6 (1.3-4.8) | 2.6 (1.4-4.6) | 2.6 (1.3-4.8) | 2.6 (1.3-4.8) | 0.34 |
|-------------------------------------------------------|---------------|---------------|---------------|---------------|---------------|------|

IQR: Interquartile Range.

**Appendix 4. Subsequent Leiomyoma Procedures (Including the Magnetic Resonance–Guided, Focused Ultrasound Surgery Cohort), Stratified by Index Procedure (N=24,198)**

|                                                                                                                           | <b>MRgFUS</b><br>(N=47) | <b>Myomectomy</b><br>(N=19965) | <b>UAE</b><br>(N=4186) | <b>Overall</b><br>(N=24,198) | <b>p-value</b> |
|---------------------------------------------------------------------------------------------------------------------------|-------------------------|--------------------------------|------------------------|------------------------------|----------------|
| <b>Subsequent leiomyoma procedure, N (%)</b>                                                                              | 21 (44.7%)              | 2648 (13.3%)                   | 689 (16.5%)            | 3358 (13.9%)                 | 0.01           |
| <b>Leiomyoma procedure type<sup>1</sup> among those with a second procedure</b>                                           | n=21                    | n=2648                         | n=689                  | n=3358                       | <0.01          |
| MRgFUS, n (%)                                                                                                             | 4 (19.0%)               | 0 (0.0%)                       | 0 (0.0%)               | 4 (0.1%)                     |                |
| Myomectomy, n (%)                                                                                                         | 5 (23.8%)               | 866 (32.7%)                    | 109 (15.8%)            | 980 (29.2%)                  |                |
| UAE, n (%)                                                                                                                | 1 (4.8%)                | 132 (5.0%)                     | 91 (13.2%)             | 224 (6.7%)                   |                |
| Hysterectomy, n (%)                                                                                                       | 11 (52.4%)              | 1650 (62.3%)                   | 489 (71.0%)            | 2150 (64.0%)                 |                |
| <b>Duration<sup>2</sup> between index leiomyoma procedure and any subsequent leiomyoma procedure (# years), Mean (SD)</b> | 1.1 (0.7-2.2)           | 1.6 (0.6-3.2)                  | 1.3 (0.7-2.7)          | 1.5 (0.6-3.1)                | 0.04           |
| <b>Subsequent hysterectomy<sup>3</sup>, N (%)</b>                                                                         | 13 (27.7%)              | 1773 (8.9%)                    | 530 (12.7%)            | 2316 (9.6%)                  | <0.01          |
| <b>Duration between index leiomyoma procedure and subsequent hysterectomy (# years), Mean(SD)</b>                         | 2.1 (0.9-2.9)           | 1.8 (0.7-3.6)                  | 1.6 (0.8-2.9)          | 1.8 (0.7-3.4)                | 0.27           |

<sup>1</sup> Leiomyoma procedure types were based on the type of the second procedure among those who had a subsequent leiomyoma procedure(s).

<sup>2</sup>Duration refers to the duration between the index leiomyoma procedure and the second leiomyoma procedure.

<sup>3</sup> Hysterectomy here includes both second procedures and any subsequent procedures that were hysterectomies.

**Appendix 5. Five-Year Health Care Utilization, Including Magnetic Resonance–Guided, Focused Ultrasound Surgery Cohort (N=31,294), Median (IQR)**

|                                                                    | <b>MRgFUS</b><br>(N=17) | <b>Myomectomy</b><br>(N=4,684) | <b>UAE</b><br>(N=910) | <b>Hysterectomy</b><br>(N=25,683) | <b>p-value</b> |
|--------------------------------------------------------------------|-------------------------|--------------------------------|-----------------------|-----------------------------------|----------------|
| <b>Leiomyoma-Related Outpatient Visits</b>                         | 7 (4-13)                | 1 (0-4)                        | 4 (2-6)               | 0 (0-0)                           | <0.01          |
| <b>Leiomyoma-Related Emergency Department and Inpatient Visits</b> | 0 (0-1)                 | 0 (0-0)                        | 0 (0-0)               | 0 (0-0)                           | <0.01          |
| <b>All-Cause Outpatient Visits</b>                                 | 45 (26-73)              | 53 (32-86)                     | 47 (28-76)            | 46 (27-79)                        | <0.01          |
| <b>All-Cause Emergency Department and Inpatient Visits</b>         | 1 (1-3)                 | 1 (0-3)                        | 1 (0-2)               | 1 (0-2)                           | <0.01          |

Borah BJ, Yao X, Laughlin-Tommaso SK, Heien HC, Steward EA. Comparative effectiveness of uterine leiomyoma procedures using a large insurance claims database. *Obstet Gynecol* 2017; 130.

The authors provided this information as a supplement to their article.

©2017 American College of Obstetricians and Gynecologists.



**Appendix 6. Five-Year Health Care Utilization Between Myomectomy and UAE Cohorts After Propensity Score Matching (N=1,592)**

|                                                  | <b>Myomectomy</b><br>(N=796) | <b>UAE</b><br>(N=796) | <b>p-value</b> |
|--------------------------------------------------|------------------------------|-----------------------|----------------|
| <b>Leiomyoma-Related Outpatient Services</b>     | 2.7 (3.8)                    | 4.6 (4.3)             | <0.001         |
| <b>Leiomyoma-Related ED and Inpatient Visits</b> | 0.2 (0.4)                    | 0.3 (0.6)             | <0.001         |
| <b>All-Cause Outpatient Services</b>             | 68.6 (54.9)                  | 62.5 (55.4)           | 0.009          |
| <b>All-Cause ED and Inpatient Visits</b>         | 1.8 (2.7)                    | 2.0 (4.2)             | 0.642          |

Borah BJ, Yao X, Laughlin-Tommaso SK, Heien HC, Steward EA. Comparative effectiveness of uterine leiomyoma procedures using a large insurance claims database. *Obstet Gynecol* 2017; 130.

The authors provided this information as a supplement to their article.

©2017 American College of Obstetricians and Gynecologists.

**Appendix 7. Five-Year Health care Utilization Between Hysterectomy Cohort and Uterine-Sparing Treatment Cohort That Received Hysterectomy During Follow-up (N=2,124)**

|                                                                    | <b>Hysterectomy as index procedure</b><br>(N=1062) | <b>Hysterectomy during follow up</b><br>(N=1062) | <b>p-value</b> |
|--------------------------------------------------------------------|----------------------------------------------------|--------------------------------------------------|----------------|
| <b>Leiomyoma-Related Outpatient Services</b>                       | 0.2 (0.9)                                          | 4.2 (4.2)                                        | <0.001         |
| <b>Leiomyoma-Related Emergency Department and Inpatient Visits</b> | 0.0 (0.1)                                          | 0.6 (0.7)                                        | <0.001         |
| <b>All-Cause Outpatient Services</b>                               | 59.2 (55.9)                                        | 72.0 (57.2)                                      | <0.001         |
| <b>All-Cause Emergency Department and Inpatient Visits</b>         | 2.4 (4.4)                                          | 2.8 (4.4)                                        | <0.001         |

Borah BJ, Yao X, Laughlin-Tommaso SK, Heien HC, Steward EA. Comparative effectiveness of uterine leiomyoma procedures using a large insurance claims database. *Obstet Gynecol* 2017; 130.

The authors provided this information as a supplement to their article.

©2017 American College of Obstetricians and Gynecologists.
